**Oocyte-derived BMP15 and FGFs cooperate to promote glycolysis in cumulus cells****Koji Sugiura, You-Qiang Su, Francisco J. Diaz, Stephanie A. Pangas, Shweta Sharma, Karen Wigglesworth, Marilyn J. O'Brien, Martin M. Matzuk, Shunichi Shimasaki and John J. Eppig**

There was an error published in *Development* **134**, 2593-2603.

In Fig. 4, parts A and B, the indicated concentrations of TGFB2 are incorrect, they should be 0, 1.0, 5.0 and 10 ng/ml.

This error does not affect the conclusions of the paper.

The authors apologise to readers for this mistake.
